# Supplementary material for: CXCR2 Is Deregulated in ALS Spinal Cord and Its Activation Triggers Apoptosis in Motor Neuron-Like Cells Overexpressing hSOD1-G93A
Source: Cells. 2023 Jul 9;12(14):1813. doi: 10.3390/cells12141813 (PMC10377984; doi:10.3390/cells12141813)
Supplement: Supplementary file 1 [file cells-12-01813-s001.zip › cells-2254664-supplementary.pdf]

## Supplementary file

### **CXCR2 is deregulated in ALS spinal cord and its activation triggers apoptosis in motor neuron-like cells overexpressing hSOD1-G93A**

*Valentina La Cognata*<sup>1§</sup>, *Agata Grazia D'Amico*<sup>2§</sup>, *Grazia Maugeri*<sup>2</sup>, *Giovanna Morello*<sup>1</sup>, *Maria Guarnaccia*<sup>1</sup>, *Benedetta Magri*<sup>2</sup>, *Eleonora Aronica*<sup>3</sup>, *Velia D'Agata*<sup>2\*</sup>, *Sebastiano Cavallaro*<sup>1\*</sup>

<sup>1</sup> Institute for Biomedical Research and Innovation, National Research Council, Catania, Italy; valentina.lacognata@irib.cnr.it; giovanna.morello@irib.cnr.it; maria.guarnaccia@cnr.it; sebastiano.cavallaro@cnr.it

<sup>2</sup> Section of Human Anatomy and Histology, Department of Biomedical and Biotechnological Sciences, University of Catania, Catania, Italy; agata.damico@unict.it; graziamaugeri@unict.it; benedetta.magri@phd.unict.it, vdagata@unict.it

<sup>3</sup> Department of (Neuro) Pathology, Amsterdam UMC, University of Amsterdam, Amsterdam Neuroscience, Meibergdreef 9, 1105 Amsterdam, the Netherlands; e.aronica@amsterdamumc.nl

§ VLC e AGD contributed equally.

\* Correspondence: sebastiano.cavallaro@cnr.it; vdagata@unict.it

## Supplementary Figure S1

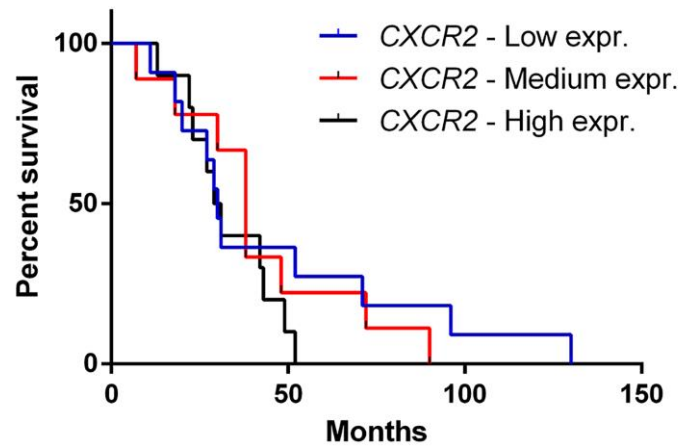

**Kaplan-Meier curve correlating the ALS patients' survival with the *CXCR2* mRNA level in spinal cord.** The figure correlates the survival (in months) of ALS patients [1,2] with the low, medium or high normalized expression levels of *CXCR2* mRNA in spinal cord. Expression values were divided in three percentiles. ALS patients with i) *CXCR2* low expression: n.= 11; ii) *CXCR2* medium expression: n.= 9; iii) *CXCR2* high expression n.= 10.

## Supplementary Figure S2

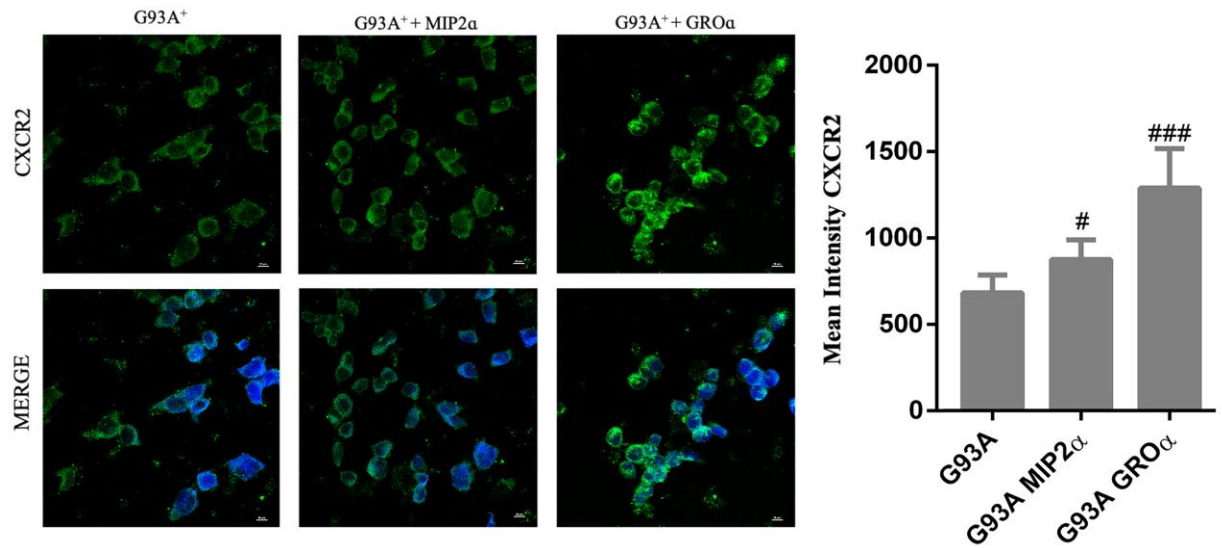

**CXCR2 immunoreactivity in activated NSC-34 cells with the G93A background after MIP2 $\alpha$  and GRO $\alpha$  incubation.** Immunofluorescence experiments showing the immunoreactivity of CXCR2 in SOD1-G93A NSC-34 cells after 24 hours of treatment with MIP2 $\alpha$  (100 nM) or GRO $\alpha$  (1 ng/ml). Images are representative of randomly selected fields scanned by Nikon Ti Eclipse inverted micro-scope. Scale bar 10  $\mu$ m. Fluorescence was quantified extrapolating the mean intensity of FITC channel from multiple regions of interest (ROI) normalized to the background by using the NIS-Elements AR (Advanced Research) software. Data are expressed as Mean  $\pm$  SEM (# $p$ <0.05 vs control G93A, ### $p$ <0.001 vs control G93A as determined by One-way ANOVA followed by Tukey–Kramer *post hoc* test).

**Supplementary Figure S3**

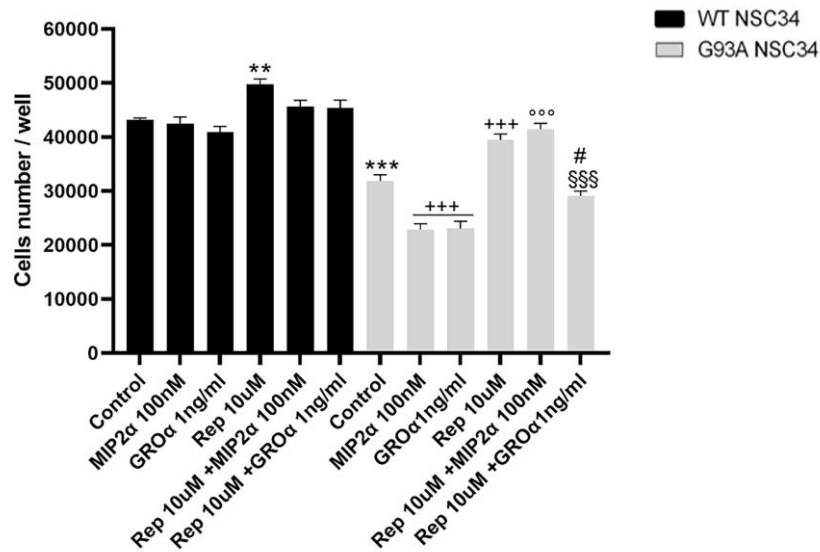

**Number of viable cells after CXCR2 activation or pharmacological blockade by reparixin treatment in NSC-34 WT and SOD1-G93A cell lines.** The bar graph shows the number of viable cells evaluated through trypan blue exclusion assay. Data are expressed as Mean  $\pm$  SEM (\*\* $p$ <0.01 or \*\*\* $p$ <0.001 vs Control WT, +++ $p$ <0.001 vs Control G93A, °°° $p$ <0.001 vs MIP2α G93A, §§§ $p$ <0.001 vs GROα G93A, # $p$ <0.05 vs Rep G93A, as determined by One-way ANOVA followed by Tukey–Kramer *post hoc* test).

**Supplementary Figure S4**

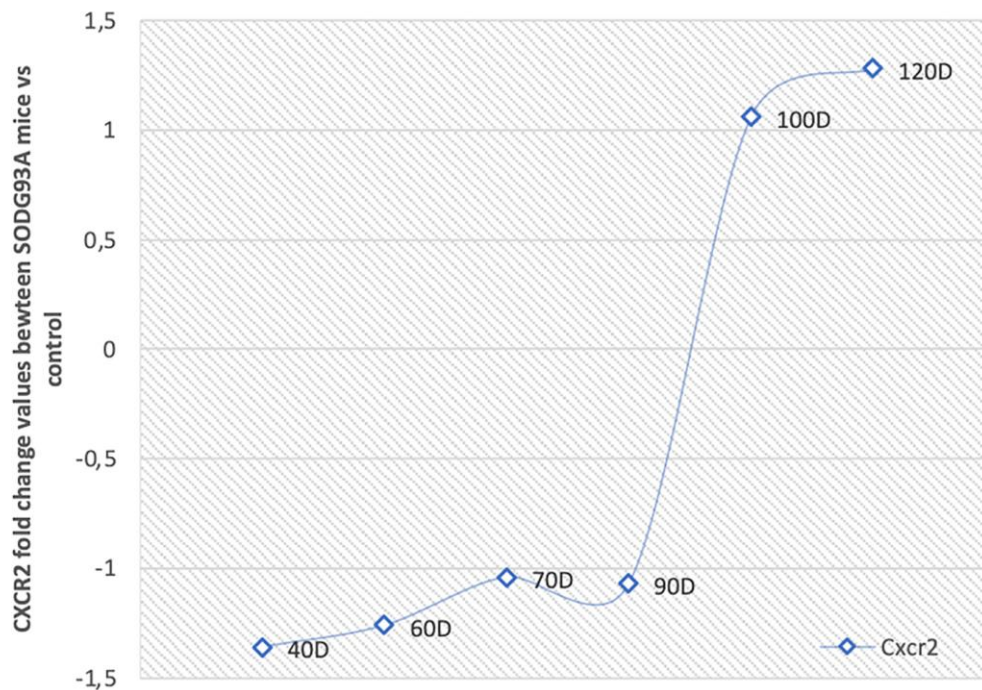

| GeneSymbol | SOD1G93A<br>vs control 40<br>days<br>(GSE50642) | SOD1G93A<br>vs control 60<br>days<br>(GSE56926) | SOD1G93A<br>vs control 70<br>days<br>(GSE27933) | SOD1G93A<br>vs control 90<br>days<br>(GSE10953) | SOD1G93A<br>vs control<br>100 days<br>(GSE27933) | SOD1G93A<br>vs control<br>120 days<br>(GSE10953) |
|------------|-------------------------------------------------|-------------------------------------------------|-------------------------------------------------|-------------------------------------------------|--------------------------------------------------|--------------------------------------------------|
| Cxcr2      | -1,36                                           | -1,07                                           | -1,04                                           | -1,07                                           | 1,06                                             | 1,28                                             |

**Time-course analysis of *Cxcr2* mRNA levels in spinal cord of SOD1-G93A mice at different stages of disease.** The figure illustrates the *Cxcr2* expression fold changes between SOD1-G93A mice versus littermate controls (y-axis) at different time points of disease state, i.e., pre-symptomatic (40-60 days), symptomatic (70–90 days), and terminal (100–120 days) (x-axis). For generating time-course analysis, we referred to following datasets: GSE50642 for 40 days old, GSE56926 for 60 days old, GSE27933 for 70- and 100-days old, and GSE10953 for both 90- and 120-days old mice, respectively. Each point represents the averaged fold change value of all probe sets representing the gene.

### Supplementary Table 1

Phenotypic characteristics of subjects (race, gender, age, disease state, survival characteristics and post-mortem interval) used in the present study for IF experiments.

| Source name | Individual   | Race      | Gender | Age | PMI (hours) | Disease state | Survival characteristics |
|-------------|--------------|-----------|--------|-----|-------------|---------------|--------------------------|
| Sample 3    | #13 09-13-07 | Caucasian | M      | 62  | 7,5         | Control       | n.a.                     |
| Sample 4    | #16 09-13-07 | Caucasian | F      | 71  | 9,5         | Control       | n.a.                     |
| Sample 5    | #18 09-13-07 | Caucasian | M      | 73  | 11          | Control       | n.a.                     |
| Sample 24   | #54 09-13-07 | Caucasian | M      | 51  | 8           | SALS          | Short-term survival      |
| Sample 30   | #66 09-13-07 | Caucasian | M      | 54  | 3           | SALS          | Medium-term survival     |
| Sample 32   | #70 09-13-07 | Caucasian | F      | 61  | 10          | SALS          | Medium-term survival     |

Patients code is the same reported in dataset E-MTAB-8635.

## Supplementary Table 2

*CXCR2* ligands differentially expressed in *SOD1*-mutant MNs from transcriptomic datasets.

|                    | <b>GSE106382</b>                | <b>GSE20589</b>                 |
|--------------------|---------------------------------|---------------------------------|
| <b>Gene Symbol</b> | Fold Change<br>(FALS SOD1/CTRL) | Fold Change<br>(FALS SOD1/CTRL) |
| <i>CXCL8</i>       | 13,52                           | 2,71                            |
| <i>CXCL1</i>       | 6,43                            | -                               |
| <i>CXCL2</i>       | 1,82                            | -                               |

The table shows the mRNA expression of *CXCR2* ligands in *SOD1*-mutant iPSC-derived MNs (DataSet Accession ID: GSE106382) and laser-capture micro-dissected MNs isolated from FALS patients carrying *SOD1* mutation (DataSet Accession ID: GSE20589) compared to healthy donors. For each gene, average fold change values of differential expression (p-value <0.05) between *SOD1*-linked FALS versus individual controls are shown. For each study, Gene Expression Omnibus DataSet Accession ID is reported.

## References

1. Aronica, E.; Baas, F.; Iyer, A.; ten Asbroek, A.L.; Morello, G.; Cavallaro, S. Molecular classification of amyotrophic lateral sclerosis by unsupervised clustering of gene expression in motor cortex. *Neurobiol Dis* **2015**, *74*, 359-376, doi:10.1016/j.nbd.2014.12.002.
2. La Cognata, V.; Gentile, G.; Aronica, E.; Cavallaro, S. Splicing Players Are Differently Expressed in Sporadic Amyotrophic Lateral Sclerosis Molecular Clusters and Brain Regions. *Cells* **2020**, *9*, doi:10.3390/cells9010159.
